# Supplementary material for: The Use of Alendronate Is Associated with a Decreased Incidence of Type 2 Diabetes Mellitus—A Population-Based Cohort Study in Taiwan
Source: PubMed Central journal article supplement (PMC4395231; doi:10.1371/journal.pone.0123279), 2015-04-13
Supplement: pone.0123279.s001.pdf [file pone.0123279.s001.pdf]

**S1 Table. Demographic Characteristics of raloxifene users and matched non-exposed Group**

|                     | Non-exposed group<br>(N=1011) | Exposed group<br>(N=337) | P-value |
|---------------------|-------------------------------|--------------------------|---------|
| Age                 | 71.00±10.35                   | 71.01±10.36              | 0.9954  |
| Age (categorical)   |                               |                          |         |
| <65                 | 258(25.52)                    | 87(25.82)                | 0.9139  |
| ≥65                 | 753(74.48)                    | 250(74.18)               |         |
| Gender              |                               |                          |         |
| Female              | 984(97.33)                    | 328(97.33)               | 1.0000  |
| Male                | 27(2.67)                      | 9(2.67)                  |         |
| Geographic region   |                               |                          |         |
| North or East       | 411(40.65)                    | 78(23.15)                | <.0001  |
| Center              | 201(19.88)                    | 92(27.30)                |         |
| South               | 399(39.47)                    | 167(49.55)               |         |
| Dyslipidemia        |                               |                          |         |
| Yes                 | 52(5.14)                      | 14(4.15)                 | 0.4662  |
| No                  | 959(94.86)                    | 323(95.85)               |         |
| Hypertension (HTN)  |                               |                          |         |
| Yes                 | 400(39.56)                    | 139(41.25)               | 0.5853  |
| No                  | 611(60.44)                    | 198(58.75)               |         |
| Dyslipidemia or HTN |                               |                          |         |
| Yes                 | 421(41.64)                    | 143(42.43)               | 0.7987  |
| No                  | 590(58.36)                    | 194(57.57)               |         |
| CCI score           |                               |                          |         |
| 0                   | 558(55.19)                    | 168(49.85)               | 0.1348  |
| 1                   | 250(24.73)                    | 101(29.97)               |         |
| >=2                 | 203(20.08)                    | 68(20.18)                |         |
| Incident DM         |                               |                          |         |
| Yes                 | 226(22.35)                    | 71(21.07)                | 0.6219  |
| No                  | 785(77.65)                    | 266(78.93)               |         |

Numbers (%) are reported for categorical variables.

Mean (SD) or median(IQR) are reported for continuous variables.

CCI: Charlson co-morbidity index
