# Supplementary material for: The Use of Alendronate Is Associated with a Decreased Incidence of Type 2 Diabetes Mellitus—A Population-Based Cohort Study in Taiwan
Source: PubMed Central journal article supplement (PMC4395231; doi:10.1371/journal.pone.0123279), 2015-04-13
Supplement: pone.0123279.s002.pdf [file pone.0123279.s002.pdf]

**S2 Table. Demographic Characteristics of Calcitonin users and matched non-exposed Group**

|                     | Non-exposed group<br>(N=3927) | Exposed group<br>(N=1309) | P-value |
|---------------------|-------------------------------|---------------------------|---------|
| Age                 | 73.40±9.29                    | 73.40±9.30                | 0.9977  |
| Age (categorical)   |                               |                           |         |
| <65                 | 663(16.88)                    | 221(16.88)                | 1.0000  |
| ≥65                 | 3264(83.12)                   | 1088(83.12)               |         |
| Gender              |                               |                           |         |
| Female              | 2634(67.07)                   | 878(67.07)                | 1.0000  |
| Male                | 1293(32.93)                   | 431(32.93)                |         |
| Geographic region   |                               |                           |         |
| North or East       | 1655(42.14)                   | 614(46.91)                | 0.0010  |
| Center              | 761(19.38)                    | 265(20.24)                |         |
| South               | 1511(38.48)                   | 430(32.85)                |         |
| Dyslipidemia        |                               |                           |         |
| Yes                 | 194(4.94)                     | 52(3.97)                  | 0.1519  |
| No                  | 3733(95.06)                   | 1257(96.03)               |         |
| Hypertension (HTN)  |                               |                           |         |
| Yes                 | 1681(42.81)                   | 597(45.61)                | 0.0767  |
| No                  | 2246(57.19)                   | 712(54.39)                |         |
| Dyslipidemia or HTN |                               |                           |         |
| Yes                 | 1753(44.64)                   | 619(47.29)                | 0.0955  |
| No                  | 2174(55.36)                   | 690(52.71)                |         |
| CCI score           |                               |                           |         |
| 0                   | 1839(46.83)                   | 563(43.01)                | 0.0272  |
| 1                   | 1049(26.71)                   | 356(27.20)                |         |
| >=2                 | 1039(26.46)                   | 390(29.79)                |         |
| Incident DM         |                               |                           |         |
| Yes                 | 897(22.84)                    | 307(23.45)                | 0.6491  |
| No                  | 3030(77.16)                   | 1002(76.55)               |         |

Numbers (%) are reported for categorical variables.

Mean (SD) or median(IQR) are reported for continuous variables.

CCI: Charlson co-morbidity index
